# Supplementary figures and images for: Congenital heart disease in adults
Source: HighWire-hosted journal article supplement (doi:10.1136/bmj.i3905), 2016-07-28

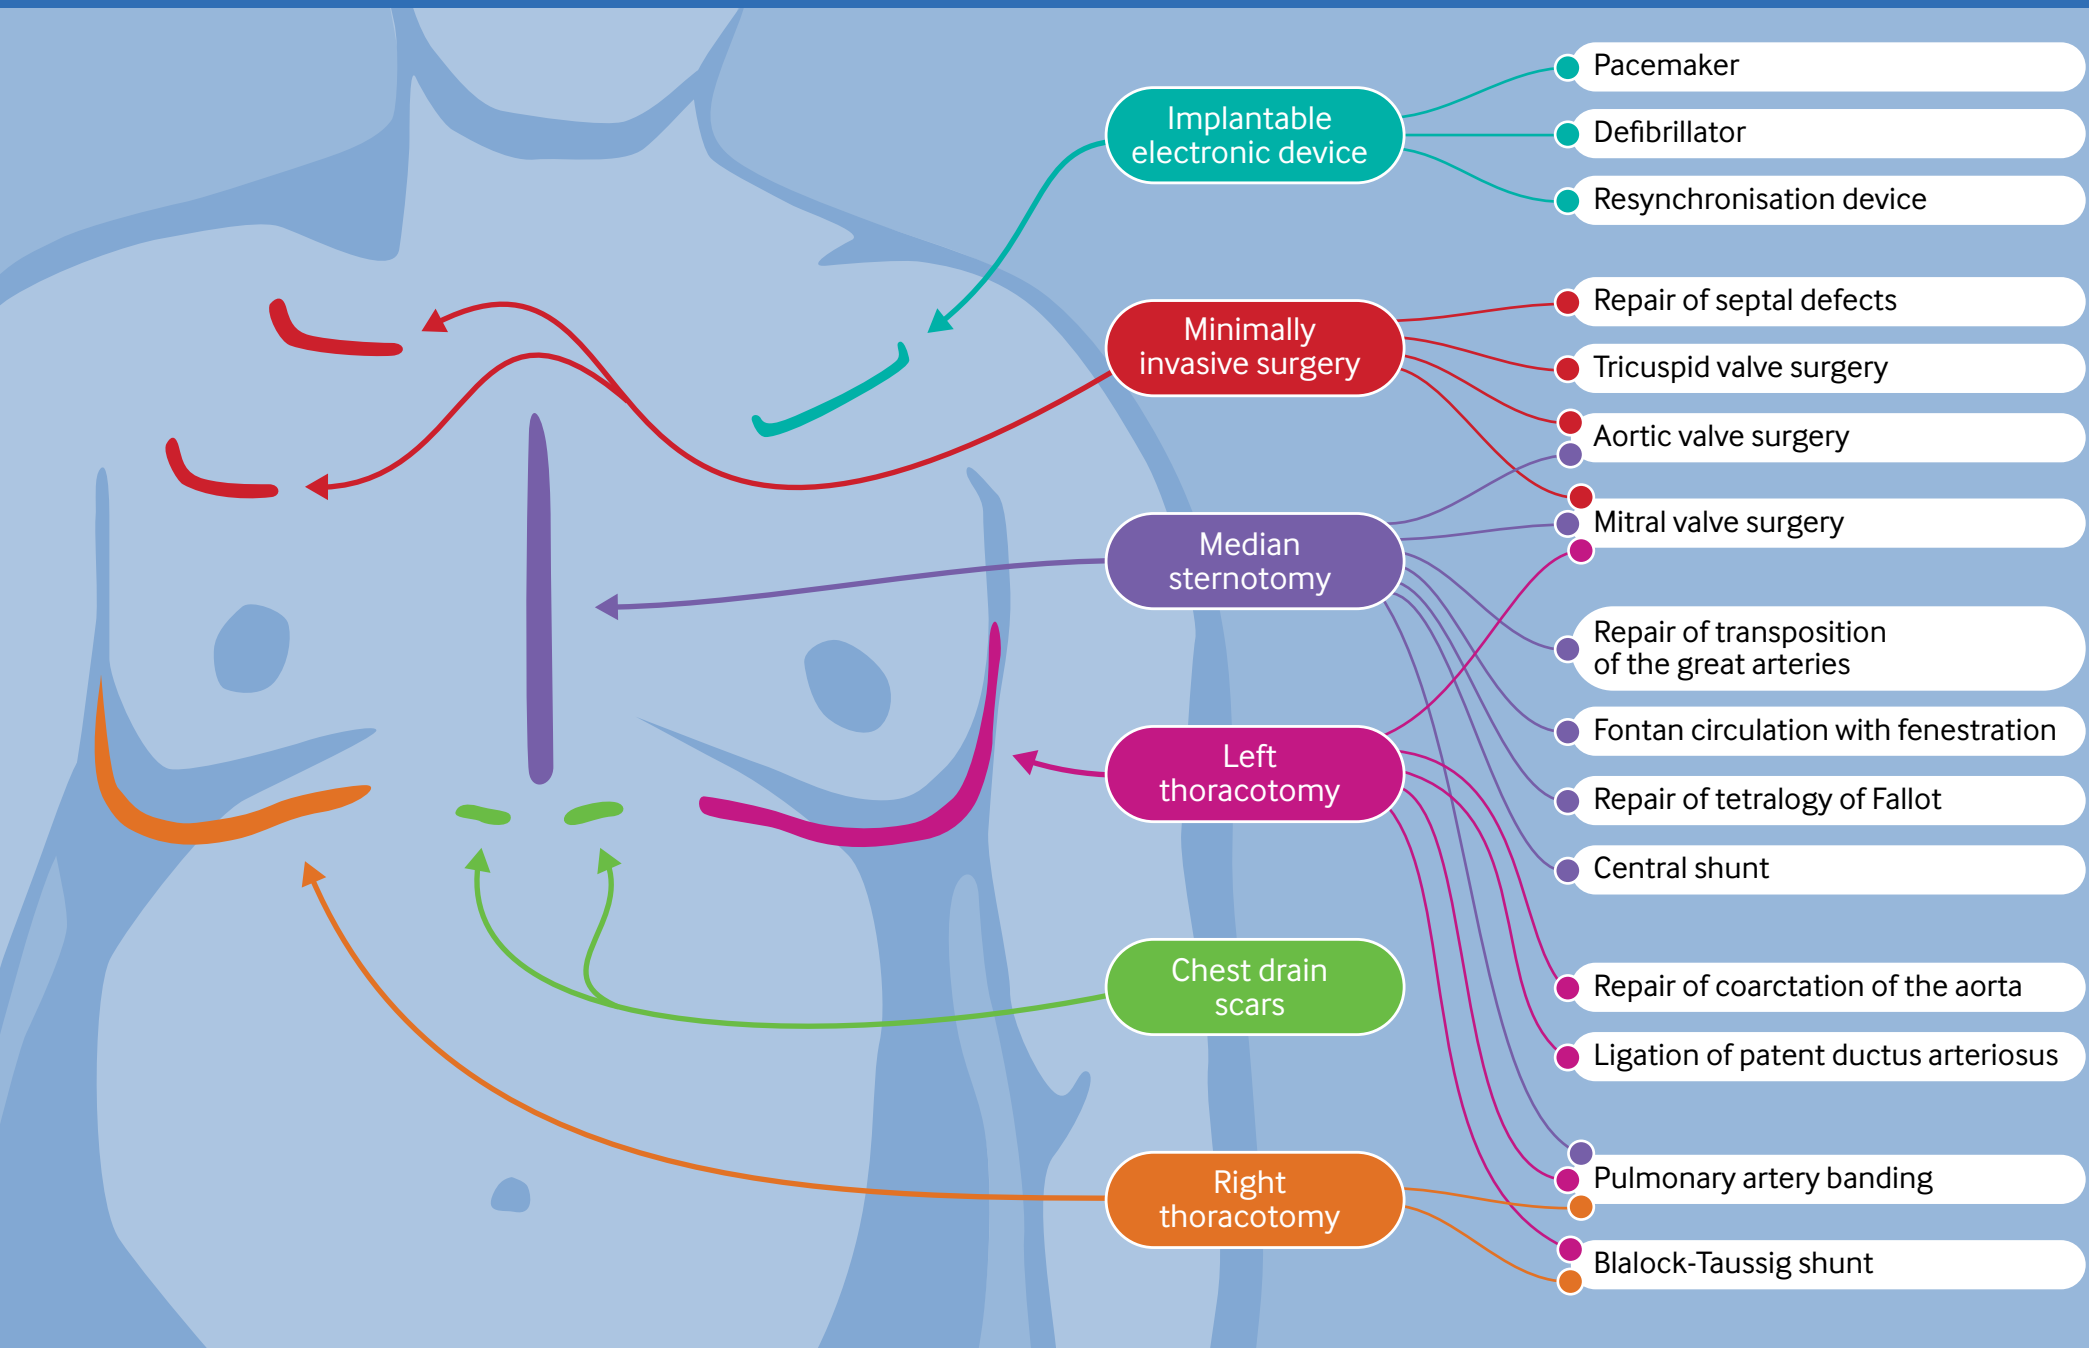

Supplement: walf033625.ww1_default.pdf [file walf033625.ww1_default.pdf]
